# Supplementary material for: Fast and Precise 3D Fluorophore Localization based on Gradient Fitting
Source: PubMed Central journal article supplement (PMC4585720; doi:10.1038/srep14335), 2015-09-22
Supplement: srep14335-s1.pdf [file srep14335-s1.pdf]

# Supplementary Information

## Fast and Precise 3D Fluorophore Localization based on Gradient Fitting

*Hongqiang Ma<sup>1</sup>, Jianquan Xu<sup>1</sup>, Jingyi Jin<sup>1,2</sup>, Ying Gao<sup>2,3</sup>, Li Lan<sup>3</sup> and Yang Liu<sup>1\*</sup>*

<sup>1</sup>Biomedical and Optical Imaging Laboratory, Departments of Medicine and Bioengineering,  
University of Pittsburgh, Pittsburgh PA 15213, USA

<sup>2</sup>School of Medicine, Tsinghua University, China

<sup>3</sup>Department of Microbiology and Molecular Genetics, University of Pittsburgh, Pittsburgh PA  
15213, USA

[\\*liuy@pitt.edu](mailto:liuy@pitt.edu)

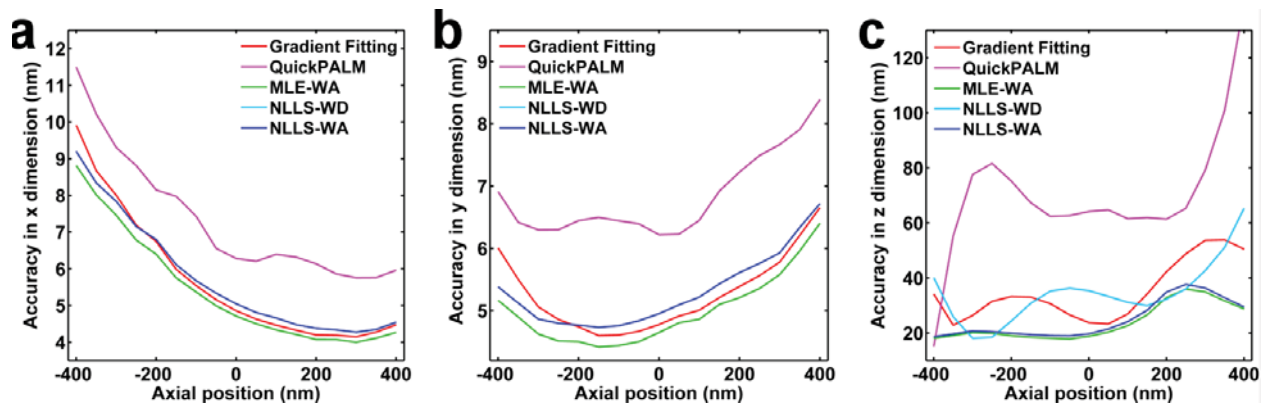

**Figure S1.** Comparison of localization accuracy using simulation. Localization accuracy in x dimension (a), y dimension (b), and z dimension (c) at different imaging depths. Note that the localization accuracy in simulation is quantified as the root mean square error between the estimated position and the corresponding true position.

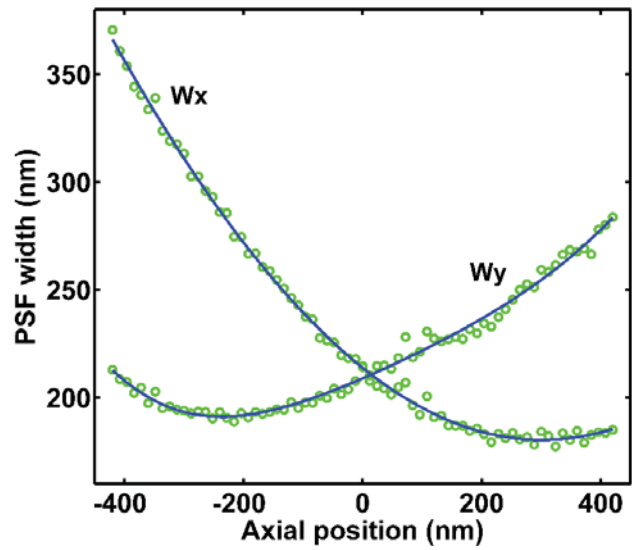

**Figure S2.** Calibration curve of point spread function (PSF) widths  $w_x$  and  $w_y$  as a function of axial position.
